# Supplementary material
Source: PubMed Central journal article supplement (PMC6981012)

**Appendix**  
**Association of E-cigarette Use With Respiratory Disease Among Adults: A Longitudinal Analysis**  
**Bhatta et al.**

**Appendix Table 1.** Percentage (Weighted) of E-Cigarette Use at Wave 1 (n=19,475)

| <b>Category</b>                   | <b>E-cigarette use at Wave 1</b> |               |                |
|-----------------------------------|----------------------------------|---------------|----------------|
|                                   | <b>Never</b>                     | <b>Former</b> | <b>Current</b> |
| <b>Combustible tobacco smoker</b> |                                  |               |                |
| Never                             | 35.6%                            | 1.4%          | 0.6%           |
| Former                            | 50.2%                            | 27.3%         | 13.9%          |
| Current                           | 14.2%                            | 71.3%         | 85.5%          |
| <b>Cigarette smoker</b>           |                                  |               |                |
| Never                             | 40.7%                            | 3.8%          | 1.4%           |
| Former                            | 48.9%                            | 33.3%         | 20.0%          |
| Current                           | 10.4%                            | 62.9%         | 78.6%          |

**Appendix**  
**Association of E-cigarette Use With Respiratory Disease Among Adults: A Longitudinal Analysis**  
**Bhatta et al.**

**Appendix Table 2.** Lung or Respiratory Conditions at Different Waves<sup>a</sup> (Numbers Are Weighted Percentages)

| Type of tobacco user                                                                                              | COPD   |       | Chronic bronchitis |       | Emphysema |       | Asthma |       | Any lung disease <sup>a</sup> |       |
|-------------------------------------------------------------------------------------------------------------------|--------|-------|--------------------|-------|-----------|-------|--------|-------|-------------------------------|-------|
|                                                                                                                   | Yes, % | No, % | Yes, %             | No, % | Yes, %    | No, % | Yes, % | No, % | Yes, %                        | No, % |
| Wave 1 baseline (n=32,320)                                                                                        |        |       |                    |       |           |       |        |       |                               |       |
| Total <sup>b</sup>                                                                                                | 3.3    | 96.7  | 3.3                | 96.7  | 1.5       | 98.5  | 11.1   | 88.9  | 15.1                          | 84.9  |
| E-cigarette user                                                                                                  |        |       |                    |       |           |       |        |       |                               |       |
| Never                                                                                                             | 70.5   | 82.7  | 69.6               | 82.7  | 65.2      | 82.6  | 78.7   | 82.7  | 76.5                          | 83.3  |
| Former                                                                                                            | 18.9   | 11.9  | 19.3               | 11.9  | 22.3      | 12.0  | 15.0   | 11.8  | 16.1                          | 11.5  |
| Current                                                                                                           | 10.6   | 5.4   | 11.1               | 5.4   | 12.5      | 5.4   | 6.3    | 5.5   | 7.4                           | 5.7   |
| Combustible tobacco smoker                                                                                        |        |       |                    |       |           |       |        |       |                               |       |
| Never                                                                                                             | 8.3    | 29.2  | 15.5               | 29.0  | 1.7       | 28.9  | 26.4   | 28.8  | 22.0                          | 29.7  |
| Former                                                                                                            | 47.1   | 45.4  | 43.7               | 45.5  | 46.4      | 45.5  | 46.2   | 45.4  | 46.0                          | 45.4  |
| Current                                                                                                           | 44.6   | 25.4  | 40.8               | 25.5  | 51.9      | 25.6  | 27.4   | 25.8  | 32.0                          | 24.9  |
| Cigarette smoker                                                                                                  |        |       |                    |       |           |       |        |       |                               |       |
| Never                                                                                                             | 9.2    | 34.0  | 16.2               | 33.8  | 4.4       | 33.6  | 31.6   | 33.4  | 25.9                          | 34.5  |
| Former                                                                                                            | 49.0   | 45.3  | 45.5               | 45.4  | 48.1      | 45.4  | 45.8   | 45.4  | 46.3                          | 45.3  |
| Current                                                                                                           | 41.8   | 20.7  | 38.3               | 20.8  | 47.5      | 21.0  | 22.6   | 21.2  | 27.9                          | 20.2  |
| Incident disease at Wave 2 or Wave 3 among people with no lung or respiratory conditions at Wave 1 <sup>c,d</sup> |        |       |                    |       |           |       |        |       |                               |       |
| Total <sup>b</sup>                                                                                                | 1.4    | 98.6  | 3.0                | 97.0  | 0.9       | 99.1  | 2.5    | 97.5  | 4.5                           | 95.5  |
| E-cigarette user                                                                                                  |        |       |                    |       |           |       |        |       |                               |       |
| Never                                                                                                             | 69.0   | 82.9  | 77.2               | 82.9  | 70.6      | 82.7  | 74.0   | 82.9  | 74.1                          | 83.7  |
| Former                                                                                                            | 20.5   | 11.8  | 15.1               | 11.8  | 18.3      | 11.9  | 16.8   | 11.7  | 17.2                          | 11.2  |
| Current                                                                                                           | 10.5   | 5.3   | 7.7                | 5.3   | 11.1      | 5.4   | 9.2    | 5.4   | 8.7                           | 5.1   |
| Combustible tobacco smoker                                                                                        |        |       |                    |       |           |       |        |       |                               |       |
| Never                                                                                                             | 11.2   | 29.4  | 25.1               | 29.1  | 14.7      | 29.1  | 22.0   | 29.0  | 21.9                          | 30.1  |
| Former                                                                                                            | 36.7   | 46.0  | 38.6               | 46.1  | 33.6      | 45.9  | 40.8   | 45.8  | 36.8                          | 46.1  |
| Current                                                                                                           | 52.1   | 24.6  | 36.3               | 24.8  | 51.6      | 25.0  | 37.2   | 25.2  | 41.3                          | 23.8  |
| Cigarette smoker                                                                                                  |        |       |                    |       |           |       |        |       |                               |       |
| Never                                                                                                             | 10.6   | 34.2  | 27.8               | 33.8  | 13.9      | 33.7  | 26.3   | 33.5  | 25.9                          | 34.8  |

**Appendix**  
**Association of E-cigarette Use With Respiratory Disease Among Adults: A Longitudinal Analysis**  
**Bhatta et al.**

|                                                                                                         |      |      |      |      |      |      |      |      |      |      |
|---------------------------------------------------------------------------------------------------------|------|------|------|------|------|------|------|------|------|------|
| Former                                                                                                  | 39.0 | 45.9 | 40.0 | 46.1 | 37.7 | 45.9 | 39.9 | 45.9 | 37.0 | 46.1 |
| Current                                                                                                 | 50.4 | 19.9 | 32.2 | 20.1 | 48.5 | 20.4 | 33.8 | 20.6 | 37.1 | 19.1 |
| Incident disease at Wave 2 among people with no lung or respiratory conditions at Wave 1 <sup>c,d</sup> |      |      |      |      |      |      |      |      |      |      |
| Total <sup>b</sup>                                                                                      | 0.7  | 99.3 | 1.7  | 98.3 | 0.5  | 99.5 | 1.4  | 98.6 | 2.5  | 97.5 |
| E-cigarette user                                                                                        |      |      |      |      |      |      |      |      |      |      |
| Never                                                                                                   | 67.6 | 82.8 | 77.1 | 82.8 | 73.5 | 82.6 | 75.1 | 82.8 | 74.5 | 83.5 |
| Former                                                                                                  | 22.2 | 11.8 | 15.1 | 11.8 | 16.2 | 12.0 | 15.7 | 11.8 | 16.5 | 11.4 |
| Current                                                                                                 | 10.2 | 5.4  | 7.8  | 5.3  | 10.3 | 5.4  | 9.2  | 5.4  | 9.0  | 5.1  |
| Combustible tobacco smoker                                                                              |      |      |      |      |      |      |      |      |      |      |
| Never                                                                                                   | 13.5 | 29.3 | 24.8 | 29.1 | 15.2 | 29.0 | 26.9 | 28.9 | 23.6 | 29.9 |
| Former                                                                                                  | 36.2 | 45.8 | 39.5 | 45.9 | 34.3 | 45.8 | 37.9 | 45.7 | 38.0 | 45.8 |
| Current                                                                                                 | 50.3 | 24.9 | 35.7 | 25.0 | 50.5 | 25.2 | 35.2 | 25.4 | 38.4 | 24.3 |
| Cigarette smoker                                                                                        |      |      |      |      |      |      |      |      |      |      |
| Never                                                                                                   | 12.5 | 34.0 | 25.7 | 33.8 | 15.2 | 33.6 | 31.4 | 33.4 | 27.6 | 34.6 |
| Former                                                                                                  | 39.3 | 45.8 | 42.1 | 45.9 | 36.0 | 45.8 | 35.9 | 45.8 | 36.6 | 45.9 |
| Current                                                                                                 | 48.2 | 20.0 | 32.2 | 20.3 | 48.8 | 20.6 | 32.7 | 20.8 | 35.8 | 19.6 |
| Incident disease at Wave 3 among people with no lung or respiratory conditions at Wave 1 <sup>c,d</sup> |      |      |      |      |      |      |      |      |      |      |
| Total <sup>b</sup>                                                                                      | 1.1  | 98.9 | 1.8  | 98.2 | 0.6  | 99.4 | 1.7  | 98.3 | 3.1  | 96.9 |
| E-cigarette user                                                                                        |      |      |      |      |      |      |      |      |      |      |
| Never                                                                                                   | 69.0 | 82.9 | 76.2 | 82.9 | 67.3 | 82.7 | 73.9 | 82.8 | 74.0 | 83.6 |
| Former                                                                                                  | 20.4 | 11.8 | 15.4 | 11.8 | 20.8 | 11.9 | 17.8 | 11.7 | 17.5 | 11.3 |
| Current                                                                                                 | 10.6 | 5.3  | 8.4  | 5.3  | 12.0 | 5.4  | 8.3  | 5.5  | 8.5  | 5.1  |
| Combustible tobacco smoker                                                                              |      |      |      |      |      |      |      |      |      |      |
| Never                                                                                                   | 9.2  | 29.4 | 24.3 | 29.1 | 12.9 | 29.0 | 22.1 | 29.0 | 20.3 | 30.1 |
| Former                                                                                                  | 37.5 | 45.9 | 38.4 | 46.0 | 29.1 | 45.9 | 40.0 | 45.7 | 36.6 | 45.9 |
| Current                                                                                                 | 53.3 | 24.7 | 37.3 | 24.9 | 58.0 | 25.1 | 37.9 | 25.3 | 43.0 | 24.0 |
| Cigarette smoker                                                                                        |      |      |      |      |      |      |      |      |      |      |
| Never                                                                                                   | 8.9  | 34.1 | 28.3 | 33.8 | 11.3 | 33.7 | 26.8 | 33.5 | 25.0 | 34.7 |
| Former                                                                                                  | 38.7 | 45.9 | 38.5 | 46.0 | 36.2 | 45.8 | 38.6 | 45.8 | 36.4 | 45.9 |
| Current                                                                                                 | 52.4 | 20.0 | 33.2 | 20.3 | 52.5 | 20.5 | 34.6 | 20.7 | 38.6 | 19.6 |

<sup>a</sup>Any lung or respiratory disease can be less than total of individual disease because one individual can have several different diseases.

**Appendix**  
**Association of E-cigarette Use With Respiratory Disease Among Adults: A Longitudinal Analysis**  
**Bhatta et al.**

<sup>b</sup>Row percentage.

<sup>c</sup>Sample sizes differ for different respiratory conditions because respondents who answered each condition were separately tabulated.

<sup>d</sup>COPD (n=22,759); chronic bronchitis (n=22,708); emphysema (n=23,191); asthma (n=20,531); any lung disease (n=19,475).

COPD, chronic obstructive pulmonary disease.

**Appendix Table 3.** Measure of Nicotine Addiction Among Current Tobacco Users at Wave 1

| Variables at Wave 1                              | Respiratory disease at Waves 2 or 3<br>(excluding people with respiratory disease at wave 1) |                      |                     |                                  |
|--------------------------------------------------|----------------------------------------------------------------------------------------------|----------------------|---------------------|----------------------------------|
|                                                  | <i>n</i>                                                                                     | Yes, median<br>(IQR) | No, median<br>(IQR) | <i>p</i> -<br>value <sup>a</sup> |
| Time (minutes) to first tobacco use after waking |                                                                                              |                      |                     |                                  |
| E-cigarette                                      | 849                                                                                          | 30 (5–120)           | 60 (15–120)         | <b>0.041</b>                     |
| Cigarette                                        | 6,364                                                                                        | 20 (5–60)            | 30 (10–60)          | <b>&lt;0.001</b>                 |
| Traditional cigar                                | 504                                                                                          | 240 (60–480)         | 360 (180–600)       | <b>0.007</b>                     |
| Cigarillo                                        | 652                                                                                          | 180 (20–300)         | 240 (60–420)        | <b>0.037</b>                     |
| Filtered cigar                                   | 294                                                                                          | 60 (8.8–180)         | 90 (20–300)         | 0.088                            |
| Pipe                                             | 165                                                                                          | 90 (26–310)          | 300 (190–620)       | 0.136                            |
| Hookah                                           | 1,640                                                                                        | 480 (300–600)        | 600 (480–720)       | <b>&lt;0.001</b>                 |
| Frequency of tobacco use per day                 |                                                                                              |                      |                     |                                  |
| E-cigarette (cartridges/day)                     | 730                                                                                          | 1 (1–2)              | 1 (1–2)             | <b>0.004</b>                     |
| Cigarette                                        | 9,960                                                                                        | 13 (7–20)            | 10 (5–20)           | <b>&lt;0.001</b>                 |
| Traditional cigar                                | 670                                                                                          | 2 (1–3)              | 1 (1–2)             | <b>&lt;0.001</b>                 |
| Cigarillo                                        | 836                                                                                          | 2 (1–4)              | 2 (1–3)             | <b>0.004</b>                     |
| Filtered cigar                                   | 330                                                                                          | 6 (2–14)             | 3 (1–10)            | 0.077                            |
| Pipe number of bowls/day                         | 162                                                                                          | 2 (1–4)              | 2 (1–3)             | 0.814                            |
| Hookah number of time/day                        | 600                                                                                          | 0.15 (0.1–0.42)      | 0.14 (0.1–0.42)     | 0.163                            |

*Note:* Boldface indicates statistical significance ( $p < .05$ ).

<sup>a</sup>Mann–Whitney Rank Sum Test

**Appendix**  
**Association of E-cigarette Use With Respiratory Disease Among Adults: A Longitudinal Analysis**  
**Bhatta et al.**

**Appendix Table 4.** Regular/Last Flavored Tobacco Use Among Current and Former Users at Wave 1

| Variables at Wave 1                | Respiratory disease at Waves 2 or 3<br>(excluding people with respiratory disease at wave 1) |       |                              |
|------------------------------------|----------------------------------------------------------------------------------------------|-------|------------------------------|
|                                    | Yes, %                                                                                       | No, % | <i>p</i> -value <sup>a</sup> |
| Flavored e-cigarette (n=1,074)     |                                                                                              |       | 0.850                        |
| Yes                                | 66.6                                                                                         | 67.7  |                              |
| No                                 | 33.4                                                                                         | 32.3  |                              |
| Flavored cigarette (n=6,709)       |                                                                                              |       | 0.170                        |
| Yes                                | 34.9                                                                                         | 38.3  |                              |
| No                                 | 65.1                                                                                         | 61.7  |                              |
| Flavored traditional cigar (n=675) |                                                                                              |       | 0.701                        |
| Yes                                | 38.5                                                                                         | 35.5  |                              |
| No                                 | 61.5                                                                                         | 64.5  |                              |
| Flavored cigarillo (n=1,084)       |                                                                                              |       | 0.933                        |
| Yes                                | 60.2                                                                                         | 60.7  |                              |
| No                                 | 39.8                                                                                         | 39.3  |                              |
| Flavored filtered cigar (n=434)    |                                                                                              |       | 0.298                        |
| Yes                                | 73.3                                                                                         | 64.7  |                              |
| No                                 | 26.7                                                                                         | 35.3  |                              |
| Flavored pipe (n=208)              |                                                                                              |       | 0.648                        |
| Yes                                | 26.6                                                                                         | 33.4  |                              |
| No                                 | 73.4                                                                                         | 66.6  |                              |
| Flavored hookah (n=1,439)          |                                                                                              |       | 0.161                        |
| Yes                                | 81.2                                                                                         | 88.1  |                              |
| No                                 | 18.8                                                                                         | 11.9  |                              |

<sup>a</sup> $\chi^2$

**Appendix**  
**Association of E-cigarette Use With Respiratory Disease Among Adults: A Longitudinal Analysis**  
**Bhatta et al.**

**Appendix Table 5.** Associations Between E-Cigarette Use and Respiratory Disease Controlling for Cigarette Smoking

| Variables                  | Cross-sectional associations between e-cigarette user and respiratory disease at Wave 1 (baseline) |                  | Longitudinal association between incident respiratory disease (at Wave 2 or 3) and e-cigarette user at Wave 1 excluding people who reported respiratory disease at Wave 1 |                  |
|----------------------------|----------------------------------------------------------------------------------------------------|------------------|---------------------------------------------------------------------------------------------------------------------------------------------------------------------------|------------------|
|                            | AOR (95% CI)                                                                                       | <i>p</i> -value  | AOR (95% CI)                                                                                                                                                              | <i>p</i> -value  |
| <b>E-cigarette user</b>    |                                                                                                    |                  |                                                                                                                                                                           |                  |
| Never                      | ref                                                                                                |                  | ref                                                                                                                                                                       |                  |
| Former                     | <b>1.32 (1.21, 1.44)</b>                                                                           | <b>&lt;0.001</b> | <b>1.24 (1.03, 1.50)</b>                                                                                                                                                  | <b>0.026</b>     |
| Current                    | <b>1.29 (1.15, 1.45)</b>                                                                           | <b>&lt;0.001</b> | 1.23 (1.00, 1.51)                                                                                                                                                         | 0.050            |
| <b>Cigarette smoker</b>    |                                                                                                    |                  |                                                                                                                                                                           |                  |
| Never                      | ref                                                                                                |                  | ref                                                                                                                                                                       |                  |
| Former                     | <b>1.25 (1.11, 1.41)</b>                                                                           | <b>0.003</b>     | 1.13 (0.86, 1.48)                                                                                                                                                         | 0.389            |
| Current                    | <b>1.66 (1.47, 1.87)</b>                                                                           | <b>&lt;0.001</b> | <b>2.70 (2.10, 3.45)</b>                                                                                                                                                  | <b>&lt;0.001</b> |
| <b>High blood pressure</b> |                                                                                                    |                  |                                                                                                                                                                           |                  |
| Yes                        | <b>1.38 (1.20, 1.58)</b>                                                                           | <b>&lt;0.001</b> | <b>1.26 (1.01, 1.57)</b>                                                                                                                                                  | <b>0.041</b>     |
| <b>High cholesterol</b>    |                                                                                                    |                  |                                                                                                                                                                           |                  |
| Yes                        | <b>1.26 (1.12, 1.43)</b>                                                                           | <b>&lt;0.001</b> | 1.10 (0.84, 1.45)                                                                                                                                                         | 0.482            |
| <b>Diabetes mellitus</b>   |                                                                                                    |                  |                                                                                                                                                                           |                  |
| Yes                        | <b>1.39 (1.22, 1.59)</b>                                                                           | <b>&lt;0.001</b> | <b>1.36 (1.04, 1.79)</b>                                                                                                                                                  | <b>0.027</b>     |
| <b>Age in years</b>        |                                                                                                    |                  |                                                                                                                                                                           |                  |
| 18–24                      | ref                                                                                                |                  | ref                                                                                                                                                                       |                  |
| 25–34                      | <b>0.72 (0.65, 0.80)</b>                                                                           | <b>&lt;0.001</b> | <b>0.58 (0.44, 0.77)</b>                                                                                                                                                  | <b>&lt;0.001</b> |
| 35–44                      | <b>0.71 (0.62, 0.82)</b>                                                                           | <b>&lt;0.001</b> | 0.89 (0.67, 1.18)                                                                                                                                                         | 0.414            |
| 45–54                      | <b>0.72 (0.63, 0.83)</b>                                                                           | <b>&lt;0.001</b> | 1.17 (0.92, 1.47)                                                                                                                                                         | 0.201            |
| 55–64                      | 0.85 (0.71, 1.00)                                                                                  | 0.053            | 1.09 (0.82, 1.47)                                                                                                                                                         | 0.552            |
| 65–74                      | 0.98 (0.84, 1.15)                                                                                  | 0.846            | 0.99 (0.65, 1.52)                                                                                                                                                         | 0.999            |
| 75 and above               | 1.00 (0.77, 1.29)                                                                                  | 0.994            | 1.70 (1.00, 2.88)                                                                                                                                                         | 0.052            |
| BMI                        | <b>1.02 (1.01, 1.03)</b>                                                                           | <b>&lt;0.001</b> | <b>1.03 (1.02, 1.04)</b>                                                                                                                                                  | <b>&lt;0.001</b> |
| <b>Sex</b>                 |                                                                                                    |                  |                                                                                                                                                                           |                  |
| Female                     | <b>1.47 (1.35, 1.60)</b>                                                                           | <b>&lt;0.001</b> | <b>1.68 (1.40, 2.02)</b>                                                                                                                                                  | <b>&lt;0.001</b> |

**Appendix**  
**Association of E-cigarette Use With Respiratory Disease Among Adults: A Longitudinal Analysis**  
**Bhatta et al.**

|                     |                          |                  |                          |                  |
|---------------------|--------------------------|------------------|--------------------------|------------------|
| Poverty level       |                          |                  |                          |                  |
| At or above poverty | <b>0.79 (0.72, 0.88)</b> | <b>&lt;0.001</b> | <b>0.67 (0.55, 0.83)</b> | <b>&lt;0.001</b> |
| Race/ethnicity      |                          |                  |                          |                  |
| White               | ref                      |                  | ref                      |                  |
| Black               | <b>0.88 (0.78, 0.99)</b> | <b>0.036</b>     | <b>1.42 (1.16, 1.74)</b> | <b>&lt;0.001</b> |
| Other               | 1.00 (0.83, 1.20)        | <0.993           | 1.15 (0.82, 1.61)        | 0.413            |
| Sample size, N      | 32,320                   |                  | 19,475                   |                  |
| VIF                 | <1.2                     |                  | <1.2                     |                  |

*Note:* Boldface indicates statistical significance ( $p < .05$ ).

VIF, Variance Inflation Factor.



**Appendix**  
**Association of E-cigarette Use With Respiratory Disease Among Adults: A Longitudinal Analysis**  
**Bhatta et al.**

**Appendix Table 6.** Associations Between E-Cigarette Use at Wave 1 and Incident of Respiratory Conditions at Waves 2 and 3

| Variables at Wave 1 | COPD, excluding people who reported COPD at Wave 1 |                  | Chronic bronchitis, excluding people who reported chronic bronchitis at Wave 1 |                  | Emphysema, excluding people who reported emphysema at Wave 1 |                  | Asthma, excluding people who reported asthma at Wave 1 |                  |
|---------------------|----------------------------------------------------|------------------|--------------------------------------------------------------------------------|------------------|--------------------------------------------------------------|------------------|--------------------------------------------------------|------------------|
|                     | AOR (95% CI)                                       | <i>p</i> -value  | AOR (95% CI)                                                                   | <i>p</i> -value  | AOR (95% CI)                                                 | <i>p</i> -value  | AOR (95% CI)                                           | <i>p</i> -value  |
| Disease at Wave 2   |                                                    |                  |                                                                                |                  |                                                              |                  |                                                        |                  |
| E-cigarette         |                                                    |                  |                                                                                |                  |                                                              |                  |                                                        |                  |
| Never               | ref                                                |                  | ref                                                                            |                  | ref                                                          |                  | ref                                                    |                  |
| Former              | <b>1.82 (1.23, 2.69)</b>                           | <b>0.004</b>     | <b>1.43 (1.02, 2.00)</b>                                                       | <b>0.039</b>     | 1.40 (0.69, 2.83)                                            | 0.348            | 1.23 (0.90, 1.69)                                      | 0.200            |
| Current             | 1.44 (0.79, 2.62)                                  | 0.237            | <b>1.60 (1.13, 2.27)</b>                                                       | <b>0.010</b>     | 1.60 (0.75, 3.44)                                            | 0.229            | <b>1.56 (1.10, 2.22)</b>                               | <b>0.015</b>     |
| Combustible tobacco |                                                    |                  |                                                                                |                  |                                                              |                  |                                                        |                  |
| Never               | ref                                                |                  | ref                                                                            |                  | ref                                                          |                  | ref                                                    |                  |
| Former              | 1.47 (0.42, 5.20)                                  | 0.550            | 0.95 (0.56, 1.59)                                                              | 0.844            | 0.85 (0.21, 3.42)                                            | 0.831            | 0.87 (0.53, 1.42)                                      | 0.575            |
| Current             | <b>5.79 (1.64, 20.44)</b>                          | <b>0.008</b>     | <b>1.96 (1.23, 3.12)</b>                                                       | <b>0.005</b>     | 3.66 (0.98, 13.60)                                           | 0.056            | <b>1.57 (1.02, 2.42)</b>                               | <b>0.046</b>     |
| High blood pressure |                                                    |                  |                                                                                |                  |                                                              |                  |                                                        |                  |
| Yes                 | 1.67 (0.81, 3.45)                                  | 0.168            | 1.09 (0.70, 1.71)                                                              | 0.707            | 1.41 (0.54, 3.68)                                            | 0.478            | 1.12 (0.67, 1.87)                                      | 0.648            |
| High cholesterol    |                                                    |                  |                                                                                |                  |                                                              |                  |                                                        |                  |
| Yes                 | 0.95 (0.56, 1.63)                                  | 0.862            | 1.08 (0.70, 1.66)                                                              | 0.729            | 1.50 (0.77, 2.94)                                            | 0.235            | 0.96 (0.55, 1.68)                                      | 0.896            |
| Diabetes mellitus   |                                                    |                  |                                                                                |                  |                                                              |                  |                                                        |                  |
| Yes                 | <b>2.22 (1.31, 3.77)</b>                           | <b>0.004</b>     | 1.42 (0.94, 2.15)                                                              | 0.097            | 1.05 (0.50, 2.20)                                            | 0.907            | <b>2.34 (1.40, 3.89)</b>                               | <b>0.002</b>     |
| Age in years        |                                                    |                  |                                                                                |                  |                                                              |                  |                                                        |                  |
| 18–24               | ref                                                |                  | ref                                                                            |                  | ref                                                          |                  | ref                                                    |                  |
| 25–34               | 3.61 (0.59, 22.1)                                  | 0.169            | 0.73 (0.44, 1.22)                                                              | 0.233            | 0.94 (0.29, 3.06)                                            | 0.924            | <b>0.50 (0.33, 0.74)</b>                               | <b>0.001</b>     |
| 35–44               | <b>9.46 (1.72, 52.1)</b>                           | <b>0.012</b>     | 1.53 (0.91, 2.56)                                                              | 0.109            | 0.57 (0.17, 1.97)                                            | 0.379            | 0.66 (0.39, 1.09)                                      | 0.111            |
| 45–54               | <b>30.6 (6.34, 148.0)</b>                          | <b>&lt;0.001</b> | <b>1.76 (1.10, 2.82)</b>                                                       | <b>0.021</b>     | 1.73 (0.66, 4.49)                                            | 0.265            | 1.07 (0.71, 1.62)                                      | 0.757            |
| 55–64               | <b>32.9 (6.76, 159.7)</b>                          | <b>&lt;0.001</b> | <b>2.18 (1.26, 3.78)</b>                                                       | <b>0.007</b>     | <b>5.15 (1.92, 13.85)</b>                                    | <b>0.002</b>     | 0.60 (0.28, 1.27)                                      | 0.186            |
| 65–74               | <b>80.7 (15.1, 432.3)</b>                          | <b>&lt;0.001</b> | <b>3.39 (1.66, 6.93)</b>                                                       | <b>0.001</b>     | <b>11.6 (3.10, 43.7)</b>                                     | <b>&lt;0.001</b> | 0.54 (0.25, 1.14)                                      | 0.108            |
| 75 and above        | 92.9 (16.0, 540.8)                                 | <b>&lt;0.001</b> | <b>3.57 (1.43, 8.90)</b>                                                       | <b>0.008</b>     | <b>9.72 (1.87, 50.5)</b>                                     | <b>0.008</b>     | 1.11 (0.25, 4.92)                                      | 0.889            |
| BMI                 | 1.03 (0.99, 1.05)                                  | 0.076            | <b>1.04 (1.02, 1.05)</b>                                                       | <b>&lt;0.001</b> | 1.01 (0.97, 1.06)                                            | 0.546            | 1.02 (0.99, 1.04)                                      | 0.058            |
| Sex                 |                                                    |                  |                                                                                |                  |                                                              |                  |                                                        |                  |
| Female              | 1.15 (0.62, 2.13)                                  | 0.656            | <b>1.91 (1.31, 2.78)</b>                                                       | <b>0.001</b>     | 0.61 (0.33, 1.13)                                            | 0.119            | <b>1.90 (1.36, 2.66)</b>                               | <b>&lt;0.001</b> |
| Poverty level       |                                                    |                  |                                                                                |                  |                                                              |                  |                                                        |                  |

**Appendix**  
**Association of E-cigarette Use With Respiratory Disease Among Adults: A Longitudinal Analysis**  
**Bhatta et al.**

|                            |                            |                  |                          |                  |                           |                  |                          |                  |
|----------------------------|----------------------------|------------------|--------------------------|------------------|---------------------------|------------------|--------------------------|------------------|
| At or above poverty        | <b>0.52 (0.30, 0.91)</b>   | <b>0.023</b>     | 0.89 (0.64, 1.24)        | 0.488            | <b>0.49 (0.27, 0.90)</b>  | <b>0.024</b>     | 0.74 (0.53, 1.02)        | 0.071            |
| <b>Race/ethnicity</b>      |                            |                  |                          |                  |                           |                  |                          |                  |
| White                      | ref                        |                  | ref                      |                  | ref                       |                  | ref                      |                  |
| Black                      | 0.61 (0.34, 1.09)          | 0.102            | 1.28 (0.86, 1.90)        | 0.203            | 1.16 (0.55, 2.47)         | 0.692            | 1.41 (0.95, 2.10)        | 0.094            |
| Other                      | 1.30 (0.26, 6.58)          | 0.749            | 1.66 (0.91, 3.03)        | 0.099            | 2.44 (0.63, 9.48)         | 0.200            | 1.57 (0.96, 2.56)        | 0.076            |
| Sample size                | 22,759                     |                  | 22,708                   |                  | 23,191                    |                  | 20,531                   |                  |
| VIF                        | <1.1                       |                  | <1.2                     |                  | <1.1                      |                  | <1.2                     |                  |
| <b>Disease at Wave 3</b>   |                            |                  |                          |                  |                           |                  |                          |                  |
| <b>E-cigarette</b>         |                            |                  |                          |                  |                           |                  |                          |                  |
| Never                      | ref                        |                  | ref                      |                  | ref                       |                  | ref                      |                  |
| Former                     | <b>1.52 (1.07, 2.14)</b>   | <b>0.020</b>     | <b>1.38 (1.01, 1.88)</b> | <b>0.047</b>     | <b>2.03 (1.23, 3.34)</b>  | <b>0.007</b>     | 1.31 (0.97, 1.75)        | 0.077            |
| Current                    | 1.41 (0.86, 2.33)          | 0.178            | <b>1.73 (1.27, 2.37)</b> | <b>0.001</b>     | <b>2.06 (1.24, 3.43)</b>  | <b>0.006</b>     | 1.30 (0.87, 1.95)        | 0.205            |
| <b>Combustible tobacco</b> |                            |                  |                          |                  |                           |                  |                          |                  |
| Never                      | ref                        |                  | ref                      |                  | ref                       |                  | ref                      |                  |
| Former                     | <b>3.02 (1.15, 7.93)</b>   | <b>0.027</b>     | 1.01 (0.58, 1.75)        | 0.966            | 2.11 (0.52, 8.52)         | 0.295            | 1.19 (0.75, 1.89)        | 0.469            |
| Current                    | <b>14.59 (5.34, 39.90)</b> | <b>&lt;0.001</b> | <b>1.94 (1.26, 2.98)</b> | <b>0.004</b>     | <b>8.16 (2.03, 32.7)</b>  | <b>0.004</b>     | <b>1.89 (1.26, 2.83)</b> | <b>0.003</b>     |
| <b>High blood pressure</b> |                            |                  |                          |                  |                           |                  |                          |                  |
| Yes                        | <b>1.99 (1.32, 2.99)</b>   | <b>0.001</b>     | 1.35 (0.86, 2.12)        | 0.193            | 1.56 (0.83, 2.92)         | 0.166            | 1.29 (0.88, 1.89)        | 0.196            |
| <b>High cholesterol</b>    |                            |                  |                          |                  |                           |                  |                          |                  |
| Yes                        | 0.66 (0.43, 1.02)          | 0.062            | 1.16 (0.79, 1.71)        | 0.441            | 0.95 (0.51, 1.79)         | 0.887            | 1.04 (0.67, 1.62)        | 0.862            |
| <b>Diabetes mellitus</b>   |                            |                  |                          |                  |                           |                  |                          |                  |
| Yes                        | 1.46 (0.97, 2.20)          | 0.074            | 1.06 (0.65, 1.74)        | 0.823            | 1.31 (0.77, 2.22)         | 0.325            | 1.33 (0.72, 2.45)        | 0.359            |
| <b>Age in years</b>        |                            |                  |                          |                  |                           |                  |                          |                  |
| 18–24                      | ref                        |                  | ref                      |                  | ref                       |                  | ref                      |                  |
| 25–34                      | <b>2.73 (1.08, 6.88)</b>   | <b>0.036</b>     | 0.88 (0.54, 1.43)        | 0.616            | 1.94 (0.67, 5.58)         | 0.222            | <b>0.61 (0.38, 0.97)</b> | <b>0.039</b>     |
| 35–44                      | <b>5.11 (2.04, 12.7)</b>   | <b>&lt;0.001</b> | <b>1.75 (1.11, 2.75)</b> | <b>0.018</b>     | 0.56 (0.11, 2.98)         | 0.501            | 0.77 (0.45, 1.32)        | 0.346            |
| 45–54                      | <b>16.7 (6.62, 42.2)</b>   | <b>&lt;0.001</b> | <b>1.78 (1.14, 2.77)</b> | <b>0.014</b>     | <b>6.69 (2.60, 17.2)</b>  | <b>&lt;0.001</b> | 1.33 (0.89, 1.98)        | 0.161            |
| 55–64                      | <b>24.3 (9.59, 61.7)</b>   | <b>&lt;0.001</b> | <b>2.29 (1.46, 3.60)</b> | <b>0.001</b>     | <b>10.8 (3.65, 31.8)</b>  | <b>&lt;0.001</b> | 0.99 (0.59, 1.68)        | 0.983            |
| 65–74                      | <b>47.5 (17.0, 132.5)</b>  | <b>&lt;0.001</b> | <b>2.77 (1.41, 5.44)</b> | <b>0.004</b>     | <b>28.8 (7.39, 112.5)</b> | <b>&lt;0.001</b> | 0.77 (0.44, 1.38)        | 0.389            |
| 75 and above               | <b>82.1 (29.8, 226.4)</b>  | <b>&lt;0.001</b> | <b>5.22 (1.97, 13.8)</b> | <b>0.001</b>     | 7.89 (0.72, 86.5)         | 0.095            | 1.87 (0.66, 5.30)        | 0.240            |
| BMI                        | 1.02 (0.99, 1.03)          | 0.061            | <b>1.02 (1.01, 1.04)</b> | <b>0.001</b>     | 1.00 (0.98, 1.02)         | 0.985            | <b>1.02 (1.01, 1.04)</b> | <b>0.009</b>     |
| <b>Sex</b>                 |                            |                  |                          |                  |                           |                  |                          |                  |
| Female                     | <b>1.64 (1.13, 2.40)</b>   | <b>0.012</b>     | <b>2.03 (1.49, 2.75)</b> | <b>&lt;0.001</b> | 1.31 (0.79, 2.17)         | 0.294            | <b>1.82 (1.32, 2.50)</b> | <b>&lt;0.001</b> |

**Appendix**  
**Association of E-cigarette Use With Respiratory Disease Among Adults: A Longitudinal Analysis**  
**Bhatta et al.**

|                     |                          |              |                          |                  |                          |              |                          |              |  |
|---------------------|--------------------------|--------------|--------------------------|------------------|--------------------------|--------------|--------------------------|--------------|--|
| Poverty level       |                          |              |                          |                  |                          |              |                          |              |  |
| At or above poverty | <b>0.57 (0.37, 0.88)</b> | <b>0.013</b> | <b>0.51 (0.37, 0.70)</b> | <b>&lt;0.001</b> | <b>0.44 (0.23, 0.83)</b> | <b>0.012</b> | <b>0.61 (0.43, 0.87)</b> | <b>0.007</b> |  |
| Race/ethnicity      |                          |              |                          |                  |                          |              |                          |              |  |
| White               | ref                      |              | ref                      |                  | ref                      |              | ref                      |              |  |
| Black               | 0.66 (0.43, 1.02)        | 0.062        | 1.28 (0.87, 1.88)        | 0.210            | 0.97 (0.42, 2.27)        | 0.949        | 1.26 (0.87, 1.83)        | 0.228        |  |
| Other               | 0.66 (0.36, 1.19)        | 0.174        | 1.16 (0.63, 2.15)        | 0.641            | 0.48 (0.23, 0.98)        | 0.048        | 1.26 (0.70, 2.25)        | 0.435        |  |
| Sample size         | 22,759                   |              | 22,708                   |                  | 23,191                   |              | 20,531                   |              |  |
| VIF                 | <1.1                     |              | <1.2                     |                  | <1.1                     |              | <1.2                     |              |  |

*Note:* Boldface indicates statistical significance ( $p < 0.05$ ).

COPD, chronic obstructive pulmonary disease; VIF, Variance Inflation Factor.

**Appendix**  
**Association of E-cigarette Use With Respiratory Disease Among Adults: A Longitudinal Analysis**  
**Bhatta et al.**

**Appendix Table 7.** Longitudinal Associations Between Combustible Tobacco Use and Respiratory Disease (at Wave 2 or 3), Excluding Respiratory Disease at Wave 1 Among Current Combustible Tobacco Users and Current Dual Users

| Variables at Wave 1                                         | AOR (95% CI)             | <i>p</i> -value  |
|-------------------------------------------------------------|--------------------------|------------------|
| <b>Combustible tobacco user</b>                             |                          |                  |
| Never e-cigarette or combustible tobacco user               | ref                      |                  |
| Current combustible tobacco user and never e-cigarette user | <b>2.82 (2.08, 3.82)</b> | <b>&lt;0.001</b> |
| Current combustible tobacco and e-cigarette user            | <b>3.04 (2.21, 4.17)</b> | <b>&lt;0.001</b> |
| <b>High blood pressure</b>                                  |                          |                  |
| Yes                                                         | 1.21(0.83, 1.75)         | 0.316            |
| <b>High cholesterol</b>                                     |                          |                  |
| Yes                                                         | 0.84 (0.57, 1.23)        | 0.371            |
| <b>Diabetes mellitus</b>                                    |                          |                  |
| Yes                                                         | <b>1.61 (1.09, 2.36)</b> | <b>0.017</b>     |
| <b>Age in years</b>                                         |                          |                  |
| 18–24                                                       | ref                      |                  |
| 25–34                                                       | 0.72 (0.48, 1.09)        | 0.124            |
| 35–44                                                       | 1.15 (0.80, 1.65)        | 0.443            |
| 45–54                                                       | 1.20 (0.82, 1.76)        | 0.355            |
| 55–64                                                       | 1.17 (0.80, 1.70)        | 0.422            |
| 65–74                                                       | 1.16 (0.57, 2.36)        | 0.676            |
| 75 and above                                                | 1.46 (0.62, 3.45)        | 0.391            |
| <b>BMI</b>                                                  | <b>1.02 (1.01, 1.04)</b> | <b>0.001</b>     |
| <b>Sex</b>                                                  |                          |                  |
| Female                                                      | <b>1.83 (1.39, 2.41)</b> | <b>&lt;0.001</b> |
| <b>Poverty level</b>                                        |                          |                  |
| At or above poverty                                         | <b>0.67 (0.51, 0.89)</b> | <b>0.006</b>     |
| <b>Race/ethnicity</b>                                       |                          |                  |
| White                                                       | ref                      |                  |
| Black                                                       | <b>1.47 (1.11, 1.94)</b> | <b>0.008</b>     |
| Other                                                       | <b>1.03 (0.63, 1.59)</b> | <b>0.899</b>     |
| Sample size, N                                              | 8,857                    |                  |
| VIF                                                         | <1.2                     |                  |

*Note:* Boldface indicates statistical significance ( $p < 0.05$ ).

VIF, Variance Inflation Factor.

Appendix Figure 1. Flow diagram for sample.

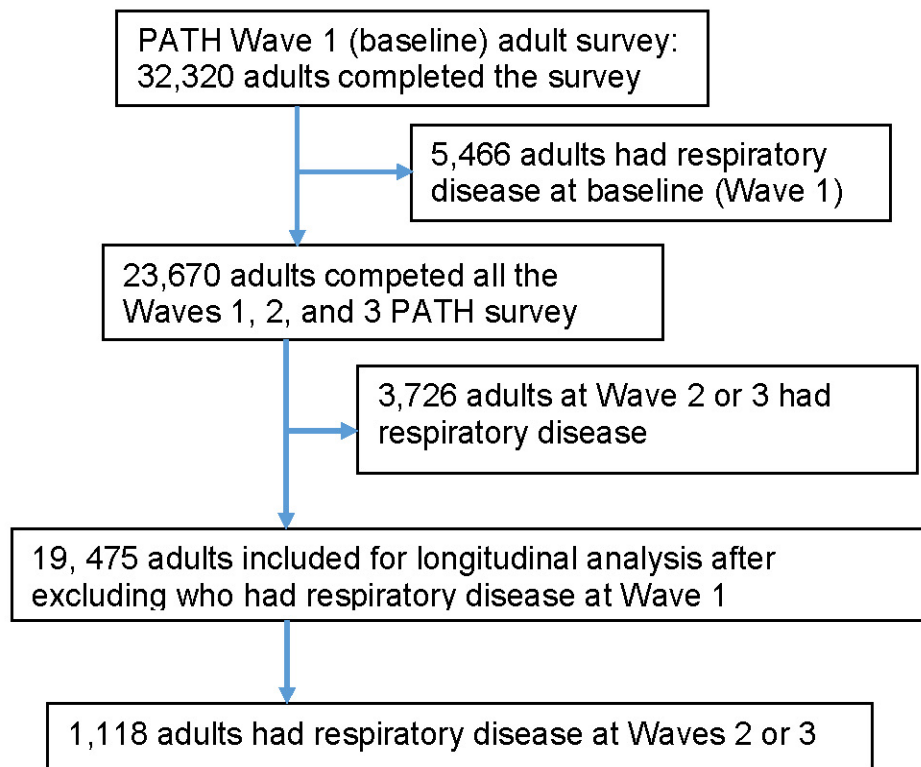

Supplement: NIHMS1543717-supplement-1.pdf [file NIHMS1543717-supplement-1.pdf]
